# Supplementary material for: Variable termination sites of DNA polymerases encountering a DNA–protein cross-link
Source: PLOS journal article supplement (doi:10.1371/journal.pone.0198480), 2018-06-01
Supplement: S7 (10.1371/journal.pone.0198480.s007) [file journal.pone.0198480.s007]

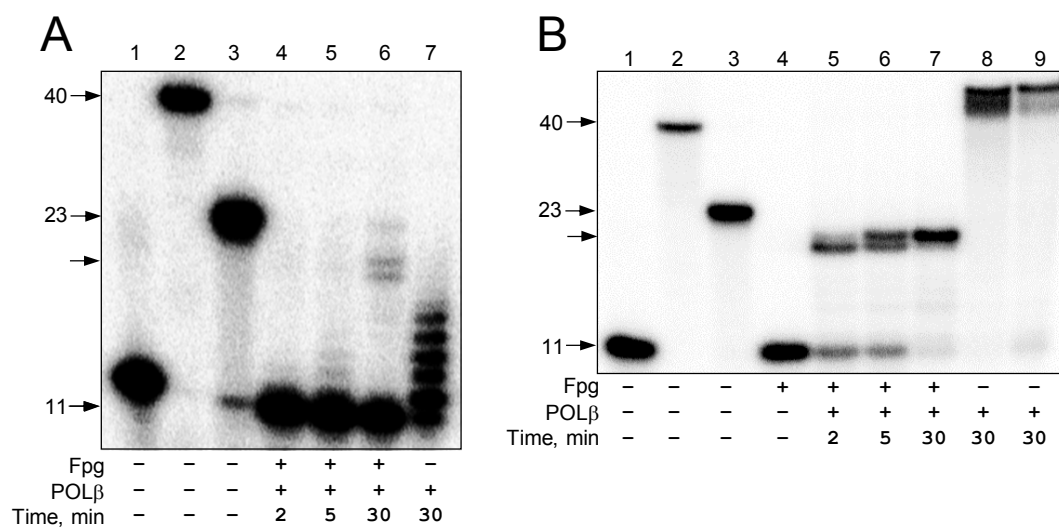

**Supplementary Fig. 7.**

Termination sites of human DNA polymerase  $\beta$  (Family X) at the DNA–protein cross-link in the template strand of single-stranded (A) or double-stranded DNA (B). Lanes 1–3, size markers (primer, 11 nt long; primer extended to the cross-link site, 23 nt; full-size product, 40 nt); the arrows indicate their positions. The presence of DNA polymerase, cross-linked Fpg, and the reaction time are shown under the gel images. Control reactions were carried out with an undamaged substrate lacking (lane 7 in panel A, lane 8 in panel B) or containing (lane 9 in panel B) the displaced strand.
